# Supplementary material for: In Situ Polymerization of Antibacterial Modification Polyamide 66 with Au@Cu2O-ZnO Ternary Heterojunction
Source: MDPI journal article supplement (doi:10.3390/polym16010158), 2024-01-04
Supplement: s1 [file s1]

# Supplementary Materials

## In-situ polymerization of antibacterial modification polyamide 66 with Au@Cu<sub>2</sub>O-ZnO ternary heterojunction

Xiang Li <sup>1</sup>, Mi Zheng <sup>2</sup>, Shikun Zhao <sup>3</sup>, Zhiwen Cao <sup>3</sup>, Kai Pan <sup>3</sup>, Xinxing Feng <sup>1</sup>, Hua Zhang <sup>1,\*</sup> Min Zheng<sup>2,\*</sup> and Cheng Wang<sup>2</sup>

<sup>1</sup> Institute of System Engineering, Academy of Military Sciences, People's Liberation Army, Beijing 100010, China; 13220298273@163.com (X.L.); feng-xinxing@hotmail.com(F.X.)

<sup>2</sup> College of Textile and Clothing Engineering, Soochow University, Suzhou, Jiangsu 215123, China; zhengm666@foxmail.com(Mi Zheng); wangcheng971027@163.com(C.W.)

<sup>3</sup> College of Materials Science and Engineering, Beijing University of Chemical Technology, Beijing 100029, China; wsadzsk@live.com (S.Z.); caozhiwen0514@163.com(Z.C.); pankai@mail.buct.edu.cn(K.P.)

\* Correspondence: stone1992@126.com (H.Z.); zhengmin@suda.edu.cn (Min Zheng)

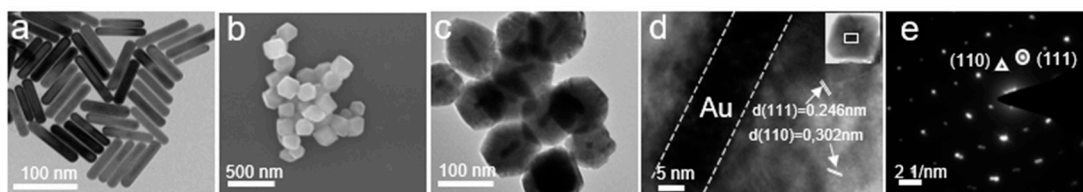

**Fig. S1.** Morphology analysis of Au@Cu<sub>2</sub>O:(a) TEM image of Au. (b)SEM image of Au@Cu<sub>2</sub>O.

(c) TEM image of Au@Cu<sub>2</sub>O. (d,e) HRTEM and SAED image of Au@Cu<sub>2</sub>O.

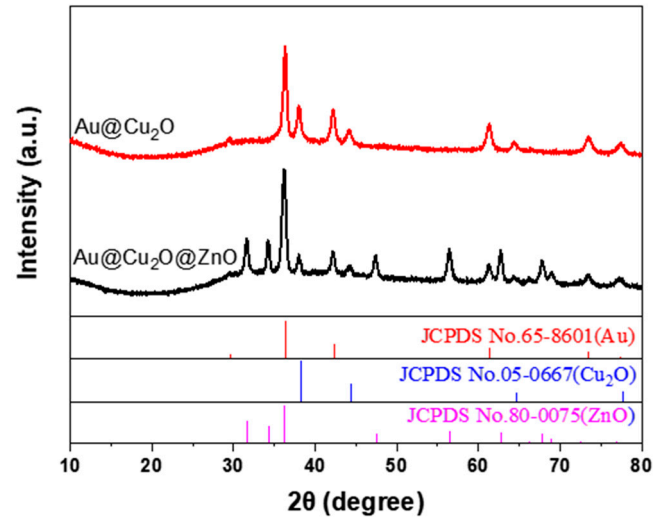

**Fig. S2.** XRD patterns of  $\text{Au@Cu}_2\text{O@ZnO}$ .

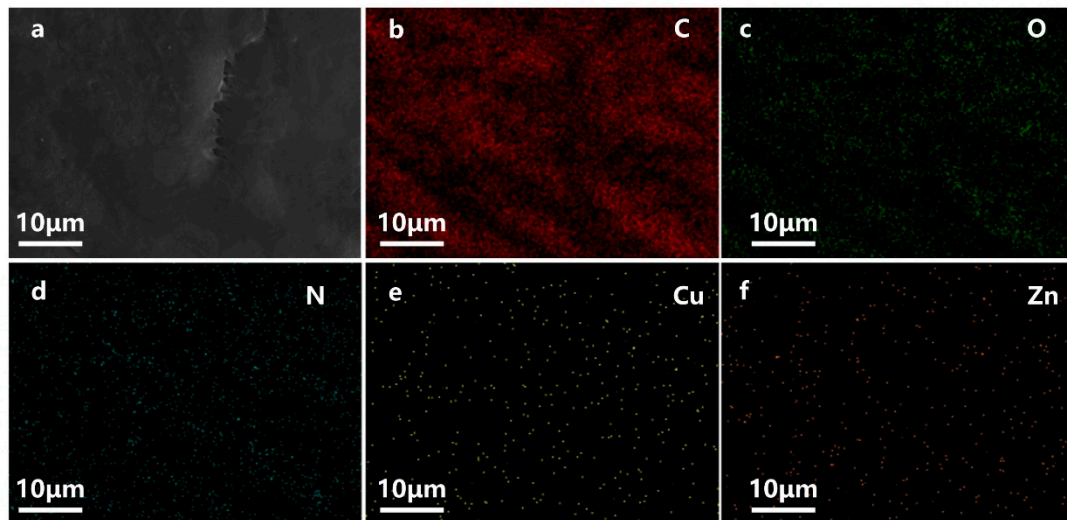

**Figure S3.** SEM images of fracture sections: (a) PA66/ $\text{Au@Cu}_2\text{O-ZnO}$ ; (b–e) Elemental mapping images of (b) C, (c) O, (d) N, (e) Cu, and (f) Zn

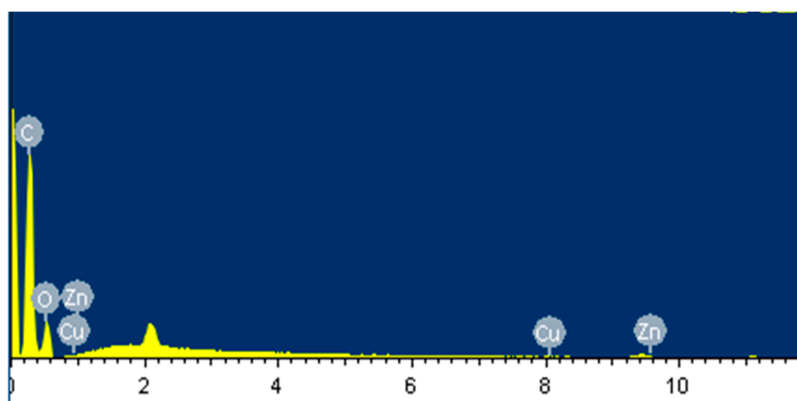

**Figure S4.** EDS spectra of fracture sections

**Table S1** Element content of fracture sections

| Element | Weight, % | Atom, % |
|---------|-----------|---------|
| C       | 66.35     | 72.79   |
| O       | 32.84     | 27.05   |
| Cu      | 0.19      | 0.04    |
| Zn      | 0.62      | 0.12    |
| Total   | 100.00    |         |

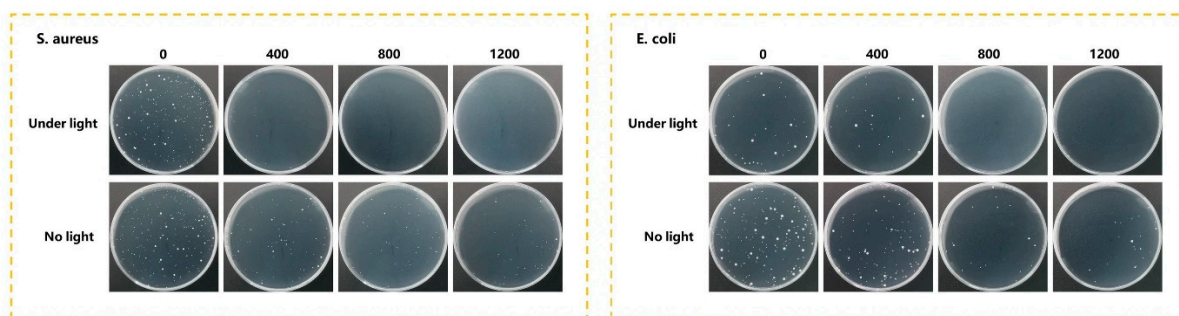

**Fig. S5.** The antibacterial test against Escherichia coli and Staphylococcus aureus of different samples.
